# Supplementary material
Source: ML conference proceedings conference paper supplement (https://openaccess.thecvf.com/content/cvpr_2015/html/Song_TVSum_Summarizing_Web_2015_CVPR_paper.html)
Supplement: Supplementary file 1 [file Song_TVSum_Summarizing_Web_2015_CVPR_supplemental.pdf]

## **Supplementary Material for** ***TVSum: Summarizing Web Videos Using Titles***

Yale Song, Jordi Vallmitjana, Amanda Stent, Alejandro Jaimes  
Yahoo Labs, New York

{yalesong, jvallmi, stent, ajaimes}@yahoo-inc.com

This supplementary material includes detailed information about our experiments presented in Section 5.2. Below gives a summary of the material; see captions in each Table and Figure for more detailed explanations.

- Figure 1 shows a tutorial page and the annotation user interface of our Amazon Mechanical Turk (AMT) study.
- Table 1 shows the original titles (provided in the SumMe dataset) and our substituted titles, along with YouTube unique video identifiers (some are missing because we could not find them).
- Figure 2 and Figure 3 show a list of 50 videos in our TVSum50 dataset.
- Figure 4 shows per-video  $F_1$  scores on our TVSum50 dataset.
- Figure 4 shows detailed experimental results (show importance scores and visualizations of the learned co-archetypes) on our TVSum50 dataset.

## Create a visual summary of a video

Our goal is to build an automatic video summarization system. One way to summarize a video is to combine chunks that contain the most important visual contents. For example, we can extract chunks whose visual content is highly relevant to the main topic and that displays the topic content in the most representative way (e.g., the best camera angle); the summary is then a chronological concatenation of the selected chunks. Your answers will help us gather data for that purpose.

### Instructions:

1. Read the title of a video, try to guess its main topic
2. Watch the entire video
3. Evaluate the importance of each chunk
4. Answer additional questionnaire

### How to score each chunk:

Please assign a numeric score to each chunk, on a scale from 1 (completely not important) to 5 (absolutely important).

Determining the importance of chunks is an ambiguous and subjective task. We want you to use your best judgement: think about how much relevant and representative it is of the topic content compared with other visually similar chunks.

Since not all parts of the video can be equally important, you will be allowed to assign a given score to only a limited number of chunks. For example, if you give parts of the video a score of 5 (most important), you can assign that score to only up to 5% of the video.

To that end, we set the target range of each score as:

- Score 5: 1% - 5%
- Score 4: 5% - 10%
- Score 3: 10% - 20%
- Score 2: 20% - 40%
- Score 1: 25% - 65%

For example, if a video has 100 chunks, you can only give a score of 5 to between 1 and 5 chunks (1%-5% of the video), a score of 4 to between 5 and 10 chunks (5%-10% of the video), etc.

Check out the [tutorial](#) for more details.

Hope you enjoy our task. Questions? Please contact us at [mturk.guru.cjswo@gmail.com](mailto:mturk.guru.cjswo@gmail.com)

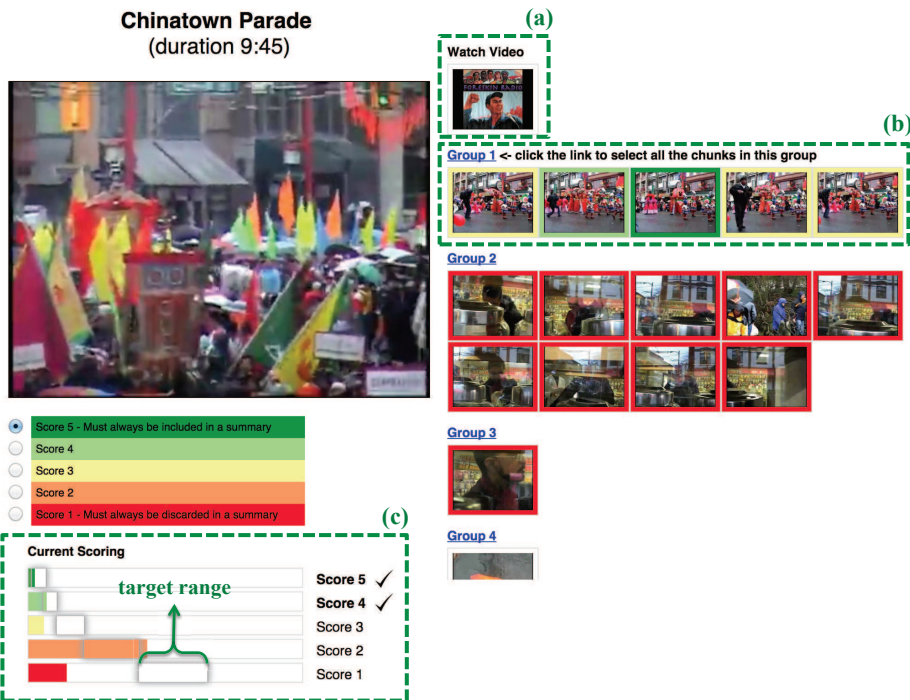

Figure 1. **Amazon Mechanical Turk study user interface.** A tutorial page (top) and the annotation user interface (bottom). (a) By clicking the image below “Watch Video,” users can replay the video at any time during the task. (b) A group of visually similar shots; we clustered shots using the  $k$ -means algorithm. Users can assign a score to each shot in a group (by clicking a thumbnail image), or all shots in a group as a whole (by clicking the group header). The groups and shots are presented in a random order to avoid the chronological bias. (c) A monitoring gadget showing the current progress towards the target range of each score.

Table 1. **Substituted titles on the SumMe dataset.** We used the original title of a video whenever possible. “(no change)” means we used the title as provided in the SumMe dataset. For those videos that we were able to find from the YouTube website, we also include their Youtube unique video identifiers. For the video ID u9E9HpuJQ7U, we changed the title to “Hibachi Cooking” because the original title “Amazing Cooking!”) was not very descriptive of the video content.

| Original Title            | Substituted Title                                          | Youtube ID (link)           |
|---------------------------|------------------------------------------------------------|-----------------------------|
| Air Force One             | Barack Obama Berlin  Die Air Force One schwebt ber TXL ein | <a href="#">uWlftWgKFc8</a> |
| Base Jumping              | Base Jumping, Wingsuit in Norway                           | <a href="#">8rmIDJEYjoU</a> |
| Bearpark Climbing         | Brenpark Bern  Berna, Ursina  Bjrk am klettern im Baum     | <a href="#">on32amsEoNA</a> |
| Bike Polo                 | (no change)                                                |                             |
| Bus in Rock Tunnel        | Charter bus in rock tunnel                                 | <a href="#">bBcsQcOyuIo</a> |
| Car over camera           | Car runs over camera                                       |                             |
| Car railcrossing          | Meanwhile At The Railway Crossing                          | <a href="#">R_0_o1N9hBw</a> |
| Cockpit Landing           | Cockpit landing                                            |                             |
| Cooking                   | Hibachi Cooking                                            | <a href="#">u9E9HpuJQ7U</a> |
| Eiffel Tower              | (no change)                                                |                             |
| Excavators river crossing | Crazy Russians crossing river excavators                   | <a href="#">nGMxQfJe7OA</a> |
| Fire Domino               | Amazing Fire Domino                                        | <a href="#">U1oT_6HzzVI</a> |
| Jump                      | Giant Waterslide Jump                                      | <a href="#">w4vW3fsJ8pk</a> |
| Kids playing in leaves    | (no change)                                                |                             |
| Notre Dame                | (no change)                                                |                             |
| Paintball                 | Paintball fight                                            |                             |
| Paluma Jump               | Rock Jumping at little Crystal Creek                       |                             |
| Playing ball              | Crow and dog playing with pingpongball                     | <a href="#">ZOYuB7-KHeU</a> |
| Playing on water slide    | (no change)                                                | <a href="#">pxnRYQnz6Ws</a> |
| Saving Dolphins           | Dolphins stranding and incredibly saved                    | <a href="#">ekmMD8oYU0</a>  |
| Scuba                     | Scuba diving                                               |                             |
| St Maarten Landing        | St. Maarten KLM Boeing 747 landing                         | <a href="#">SCIJ0F62og4</a> |
| Statue of Liberty         | (no change)                                                |                             |
| Uncut evening flight      | (no change)                                                | <a href="#">Eqs328fkiaQ</a> |
| Valparaiso Downhill       | (no change)                                                | <a href="#">9hvfYvqS-bE</a> |

| [VT] Changing a vehicle tire                                                      |                                                                                   |                                                                                   |                                                                                    |                                                                                     |
|-----------------------------------------------------------------------------------|-----------------------------------------------------------------------------------|-----------------------------------------------------------------------------------|------------------------------------------------------------------------------------|-------------------------------------------------------------------------------------|
| How to change tires for off road vehicles                                         | How to use a tyre repair kit - Which? guide                                       | Flat tire                                                                         | KODA Tips<br>How to Repair Your Tyre                                               | When to Replace Your Tires GMC                                                      |
|  |  |  |  |  |
| AwmHb44.ouw (5:54)                                                                | 98MoyGZKHxc (3:07)                                                                | J0nA4VgnoCo (9:44)                                                                | gzDbas1RIg (4:48)                                                                  | XzYM3PfTM4w (1:51)                                                                  |
| how-to                                                                            | how-to                                                                            | vlog                                                                              | how-to                                                                             | how-to                                                                              |

  

| [VU] Getting a vehicle unstuck                                                    |                                                                                   |                                                                                   |                                                                                    |                                                                                     |
|-----------------------------------------------------------------------------------|-----------------------------------------------------------------------------------|-----------------------------------------------------------------------------------|------------------------------------------------------------------------------------|-------------------------------------------------------------------------------------|
| The stuck truck of Mark, The rut that filled...                                   | BBC - Train crash                                                                 | Girl gets van stuck in the back forty                                             | Smart Electric Vehicle Balances on Two Wheels                                      | Electric cars making earth more green                                               |
|  |  |  |  |  |
| HT5vyqe0Xaw (5:22)                                                                | sTEELN-vY30 (2:29)                                                                | vdmoEJ5YbrQ (5:29)                                                                | xwqBXPGE9pQ (3:53)                                                                 | akI8YFjEmUw (2:13)                                                                  |
| egocentric                                                                        | news                                                                              | egocentric                                                                        | interview                                                                          | news                                                                                |

  

| [GA] Grooming an animal                                                            |                                                                                    |                                                                                    |                                                                                     |                                                                                      |
|------------------------------------------------------------------------------------|------------------------------------------------------------------------------------|------------------------------------------------------------------------------------|-------------------------------------------------------------------------------------|--------------------------------------------------------------------------------------|
| Pet Joy Spa Grooming Services — Brentwood, CA                                      | I am a puppy dog groomer                                                           | Nail clipper Gloria Pets professional grooming                                     | Dog Grooming in Buenos Aires                                                        | How to Clean Your Dog's Ears - Vetoquinol USA                                        |
|  |  |  |  |  |
| i3wAGJaaktw (2:36)                                                                 | Bhxx-O1Y7Ho (7:30)                                                                 | 0tmA_C6XwfM (2:21)                                                                 | 3eYKfiOEJNs (3:14)                                                                  | xxdtq8mxegs (2:24)                                                                   |
| commercial                                                                         | vlog                                                                               | how-to                                                                             | story                                                                               | how-to                                                                               |

  

| [MS] Making a sandwich                                                              |                                                                                     |                                                                                     |                                                                                      |                                                                                       |
|-------------------------------------------------------------------------------------|-------------------------------------------------------------------------------------|-------------------------------------------------------------------------------------|--------------------------------------------------------------------------------------|---------------------------------------------------------------------------------------|
| Mexican Fried Chicken Sandwich Recipe                                               | Reuben Sandwich with Corned Beef & Sauerkraut                                       | Poor Man's Meals: Spicy Sausage Sandwich                                            | Saigon Sandwich - Vietnamese Sandwiches...                                           | ...Joseph Leonard's Fried Chicken Sandwich...                                         |
|  |  |  |  |  |
| WG0MBPpPC6I (6:37)                                                                  | HI-...g2gn_A (4:03)                                                                 | Yi4Ij2NM7U4 (6:45)                                                                  | 37rzWOQsNIw (3:11)                                                                   | LRw_obCPUt0 (4:20)                                                                    |
| how-to                                                                              | how-to                                                                              | how-to                                                                              | vlog                                                                                 | story                                                                                 |

  

| [PK] Parkour                                                                        |                                                                                     |                                                                                     |                                                                                      |                                                                                       |
|-------------------------------------------------------------------------------------|-------------------------------------------------------------------------------------|-------------------------------------------------------------------------------------|--------------------------------------------------------------------------------------|---------------------------------------------------------------------------------------|
| David Belle   Fondateur du parkour...                                               | Charlotte Parkour  Charlotte Video Project                                          | Singapore Parkour Free Running...                                                   | Parkour Camp Leipzig                                                                 | Jam Parkour Via del Mar                                                               |
|  |  |  |  |  |
| cjibtmSLxQ4 (10:47)                                                                 | b626MiF1ew4 (3:55)                                                                  | XkqCExn6.Us (3:08)                                                                  | GsAD1KT1xo8 (2:25)                                                                   | PJrm840pAUI (4:34)                                                                    |
| story                                                                               | interview                                                                           | UGC                                                                                 | UGC                                                                                  | UGC                                                                                   |

Figure 2. **TVSum50 Dataset (page 1 of 2)**. Videos are grouped into query categories (e.g., [VT] Changing a vehicle tire). For each video, we show its title, thumbnail image, YouTube unique video identifier, duration, and genre. Click thumbnail images to watch videos.



| [PR] Parade                                                                       |                                                                                   |                                                                                   |                                                                                    |                                                                                     |
|-----------------------------------------------------------------------------------|-----------------------------------------------------------------------------------|-----------------------------------------------------------------------------------|------------------------------------------------------------------------------------|-------------------------------------------------------------------------------------|
| Chinese New Year Parade<br>NYC Chinatown                                          | Alumnae Parade &<br>Laurel Chain Ceremony                                         | LA Kings Stanley Cup<br>South Bay Parade                                          | Chinatown Parade                                                                   | Southend-on-Sea and<br>Kortrijk Bike Friendly...                                    |
|  |  |  |  |  |
| 91IHQYk1IQM (1:50)                                                                | RBCABdtQmI (6:04)                                                                 | z_6gVvQb2d0 (4:36)                                                                | fWutDQy1nnY (9:45)                                                                 | 4wU_LUjG5Ic (2:47)                                                                  |
| UGC                                                                               | UGC                                                                               | egocentric                                                                        | vlog                                                                               | UGC                                                                                 |

  

| [FM] Flash mob gathering                                                          |                                                                                   |                                                                                   |                                                                                    |                                                                                     |
|-----------------------------------------------------------------------------------|-----------------------------------------------------------------------------------|-----------------------------------------------------------------------------------|------------------------------------------------------------------------------------|-------------------------------------------------------------------------------------|
| Flash mob protest for Syria  <br>Sydney, Australia                                | ICC World Twenty<br>Bangladesh Flash Mob...                                       | Bluffton Teachers<br>Flash Mob Dance...                                           | ICC World Twenty<br>Bangladesh, Flash Mob...                                       | CASACL - Flashmob in<br>Copenhagen underground...                                   |
|  |  |  |  |  |
| VuWGsYPqAX8 (3:36)                                                                | JKpqYvAdIsw (2:32)                                                                | xmEERLqJ2kU (7:26)                                                                | byxOvuiIJV0 (2:34)                                                                 | _xMr-HKMfVA ()                                                                      |
| UGC                                                                               | UGC                                                                               | egocentric                                                                        | UGC                                                                                | UGC                                                                                 |

  

| [BK] Beekeeping                                                                    |                                                                                    |                                                                                    |                                                                                     |                                                                                      |
|------------------------------------------------------------------------------------|------------------------------------------------------------------------------------|------------------------------------------------------------------------------------|-------------------------------------------------------------------------------------|--------------------------------------------------------------------------------------|
| Beekeeping 101                                                                     | A Year of Beekeeping                                                               | Paper Wasp Removal  <br>From the Ground Up                                         | Killer Bees Kill 1000-lb<br>Hog in Bisbee AZ                                        | Apis Mellifera in a<br>Vertical Log Hive                                             |
|  |  |  |  |  |
| WxtbjNsCQ8A (4:25)                                                                 | uGu_10sucQo (2:47)                                                                 | EE-bNr36nyA (1:38)                                                                 | Se3oxnaPsz0 (2:18)                                                                  | oDXZc0tZe04 (6:20)                                                                   |
| interview                                                                          | UGC                                                                                | how-to                                                                             | news                                                                                | UGC                                                                                  |

  

| [BT] Attempting a bike trick                                                        |                                                                                     |                                                                                     |                                                                                      |                                                                                       |
|-------------------------------------------------------------------------------------|-------------------------------------------------------------------------------------|-------------------------------------------------------------------------------------|--------------------------------------------------------------------------------------|---------------------------------------------------------------------------------------|
| ...How to Whip<br>a Motocross Bike                                                  | Smage Bros.<br>Motorcycle Stunt Show                                                | How to stop your Fixie                                                              | How to lock your bike.<br>The RIGHT way!                                             | Pure Fix TV:<br>How to Wheelie                                                        |
|  |  |  |  |  |
| qqR6AEXwxoQ (4:29)                                                                  | EYqVtI9YWJA (3:18)                                                                  | eQu1rNs0an0 (2:44)                                                                  | JgHubY5Vw3Y (2:23)                                                                   | iVt07TCKFM0 (1:44)                                                                    |
| interview                                                                           | interview                                                                           | how-to                                                                              | how-to                                                                               | how-to                                                                                |

  

| [DS] Dog show                                                                       |                                                                                     |                                                                                     |                                                                                      |                                                                                       |
|-------------------------------------------------------------------------------------|-------------------------------------------------------------------------------------|-------------------------------------------------------------------------------------|--------------------------------------------------------------------------------------|---------------------------------------------------------------------------------------|
| German Shepherd<br>Dog Show (KCI)...                                                | The Dog Show HD                                                                     | Oliver's Show - Dog's tale                                                          | ...Obie the obese dog<br>works toward weight loss                                    | Will A Cat Eat Dog Food?                                                              |
|  |  |  |  |  |
| E11zDS9XGzg (8:30)                                                                  | NyBmCxDoHJU (3:09)                                                                  | kLxoNp-UchI (2:10)                                                                  | jcoYJXDG9sw (3:19)                                                                   | -esJrBWj2d8 (3:50)                                                                    |
| vlog                                                                                | UGC                                                                                 | UGC                                                                                 | news story                                                                           | egocentric                                                                            |

Figure 3. TVSum50 Dataset (page 2 of 2). Videos are grouped into query categories (e.g., [PR] Parade). For each video, we show its title, thumbnail image, YouTube unique video identifier, duration, and genre. Click thumbnail images to watch videos.

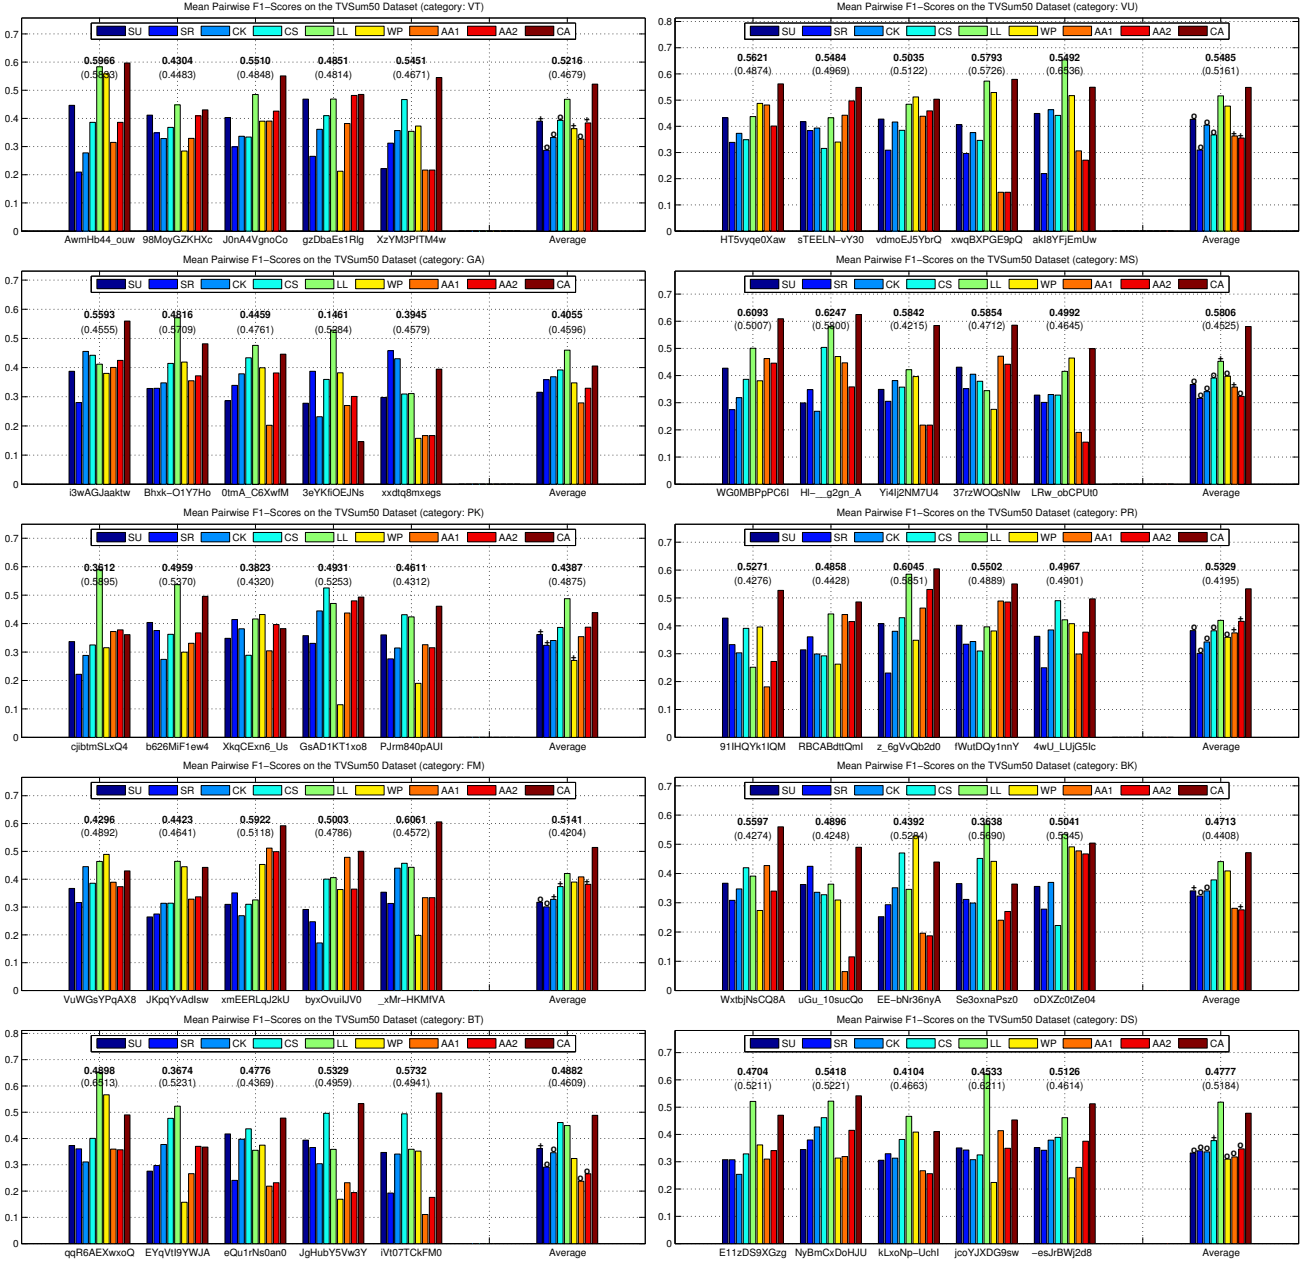

Figure 4. **Experimental results on each video category on the TVSum50 dataset.** Models compared include uniform sampling (SU), random sampling (SR),  $k$ -means clustering (CK), spectral clustering (CS), LiveLight by Zhao and Xing (LL), web image prior by Khosla *et al.* (WP), archetypal analysis with video frames (AA<sub>1</sub>), archetypal analysis with a combination of video frames and images (AA<sub>2</sub>), and our co-archetypal analysis (CA). Bold-faced numbers represent our results; numbers in parentheses represent the highest score from any baseline. The last column shows average scores, where we also show the statistical significance of the pairwise difference between our approach (CA) and the baselines (the 'o' mark indicates  $p < 0.01$ ; the '+' mark indicates  $p < 0.05$ ). Except for a few videos, our approach outperforms all other baselines.



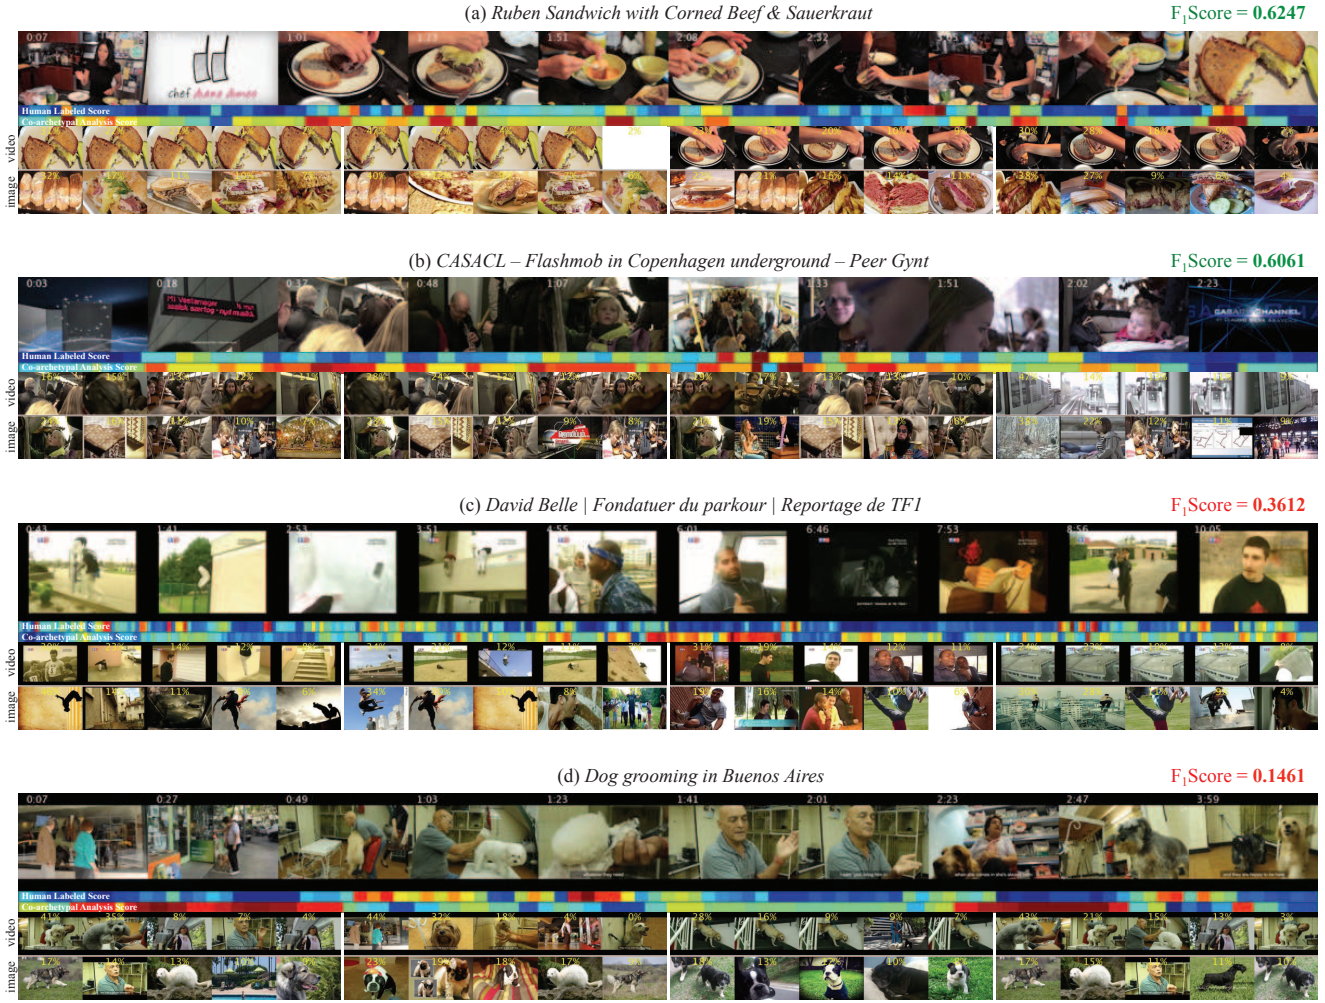

Figure 5. **Detailed results of co-archetypal analysis on the TVSum50 dataset.** Shown here are four example results (a-d), each with a video title, an  $F_1$  score of our approach, video frames, two heatmap representations of normalized shot importance scores (one from human labels, another from our approach), and four learned co-archetypes represented in terms of video frames and images; stacked in that order. (a-b) Two example results with highest  $F_1$  scores; (c-d) two example results with lowest  $F_1$  scores. The results with high  $F_1$  scores tend to show co-archetypes that match more closely with video segments scored higher by humans (e.g., (a) sandwich, (b) underground) compared to the results with low  $F_1$  scores.
